# Supplementary material
Source: Springer Nature journal article supplement (https://www.springermedizin.de/resource/supplementary/12967_2012_1092_MOESM2_ESM.pdf/9573246)

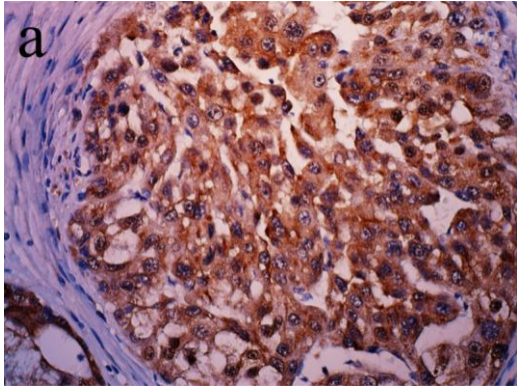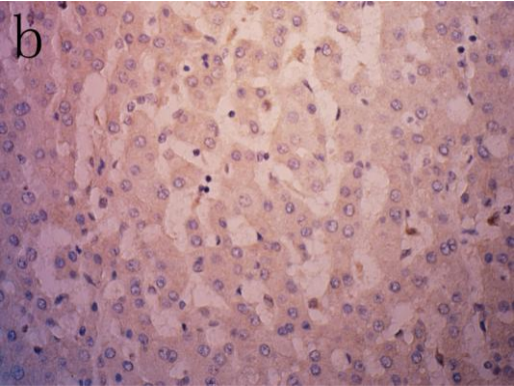

Supplement: MOESM2 [file 9573246]
